# Supplementary material
Source: ML conference proceedings conference paper supplement (https://proceedings.neurips.cc/paper_files/paper/2022/hash/cf7a83a5342befd11d3d65beba1be5b0-Abstract.html)
Supplement: Supplementary file 1 [file cf7a83a5342befd11d3d65beba1be5b0-Supplemental-Conference.zip]

Archive with 1 entries (1 files):
- MCSNET-supp.pdf
